# Supplementary material for: Transforming Growth Factor β Drives Hemogenic Endothelium Programming and the Transition to Hematopoietic Stem Cells
Source: PubMed Central journal article supplement (PMC4998007; doi:10.1016/j.devcel.2016.06.024), 2016-08-22
Supplement: mmc1.pdf [file mmc1.pdf]

**Developmental Cell, Volume 38**

**Supplemental Information**

**Transforming Growth Factor  $\beta$  Drives Hemogenic  
Endothelium Programming and the Transition  
to Hematopoietic Stem Cells**

**Rui Monteiro, Philip Pinheiro, Nicola Joseph, Tessa Peterkin, Jana Koth, Emmanouela Repapi, Florian Bonkhofer, Arif Kirmizitas, and Roger Patient**

## **Supplemental Information Inventory**

### **Supplemental Figures S1-S6**

Figure S1, related to Figure 1

Figure S2, related to Figure 2

Figure S3, related to Figure 3

Figure S4, related to Figure 4

Figure S5, related to Figure 5

Figure S6, related to Figure 6

**Supplemental Table S1 (excel file)**, related to Figure 5

**Supplemental Experimental Procedures**, related to Figures 1-6, S1-S6

**Supplemental References**, related to Supplemental Experimental Procedures and to Supplemental Table S1

## Supplemental Figures and Figure Legends

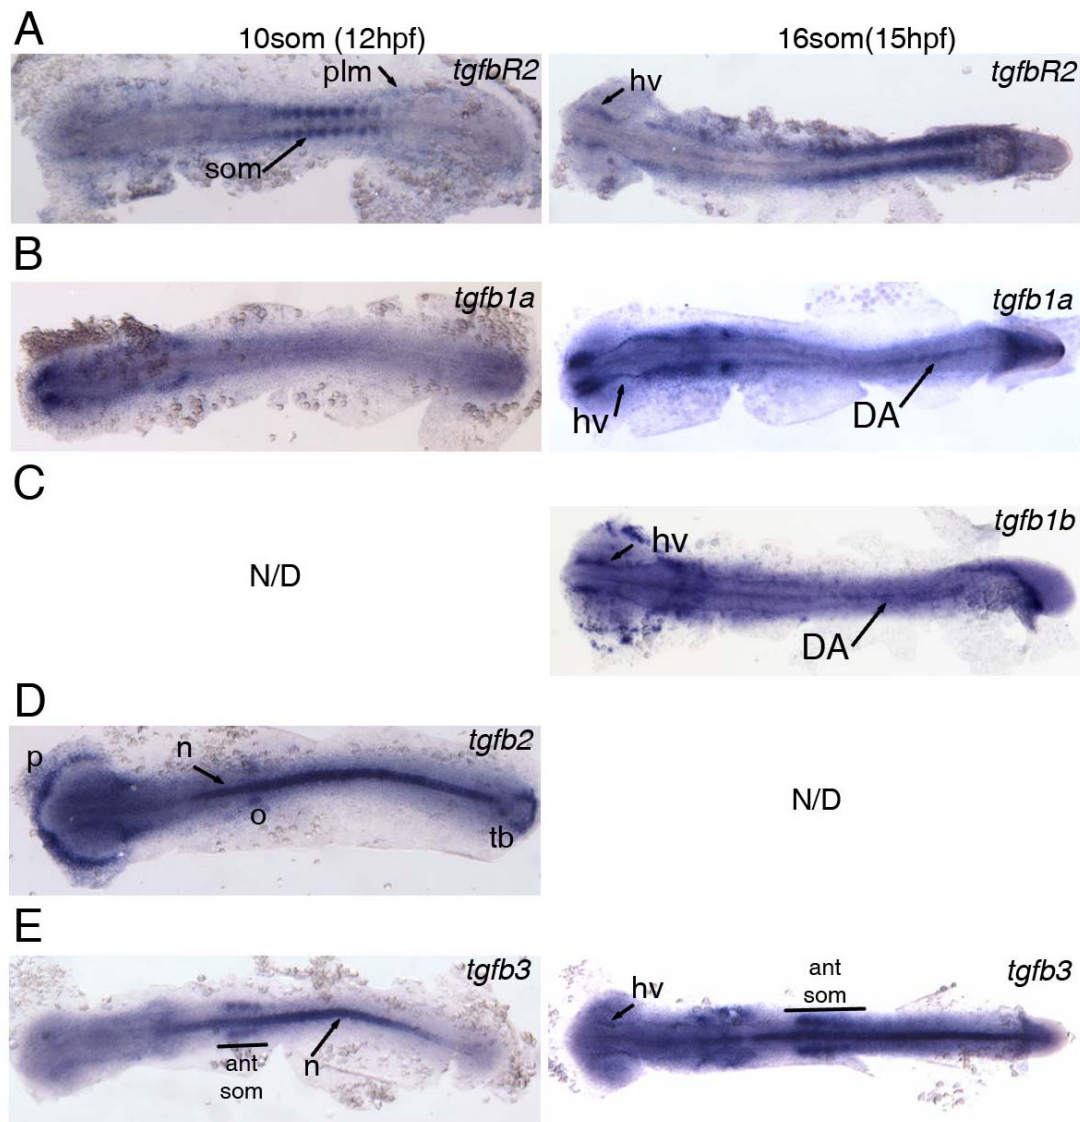

**Figure S1, related to Figure 1** – Expression of TGFβ signalling components at 12hpf (10-somite stage) and 15hpf (16-somite stage). All embryos were flatmounted for imaging. (A) Expression of *tgfbR2* in the somites (som) and posterior lateral mesoderm (plm) at 12hpf. Expression of *tgfbR2* at 15hpf in head vasculature (hv) and somites. (B) *tgfb1a* is not expressed in the posterior at 12hpf but is present in head vasculature from 12hpf and in the embryonic dorsal aorta (DA) at 15hpf. (C) *tgfb1b* is also present in the head vasculature and DA at 15hpf. Note that there is anterior expression of *tgfb1b* in cells that are likely myeloid. (D) *tgfb2* is expressed in the polster (p), otic vesicles (o), notochord (n) and in the tailbud (tb) at 12hpf. (E) Expression of *tgfb3* in the notochord and in the 4 anterior-most somites (ant som) at 12hpf. At 15hpf, the expression in the somites and notochord is maintained and weak expression in the head vasculature is observed.

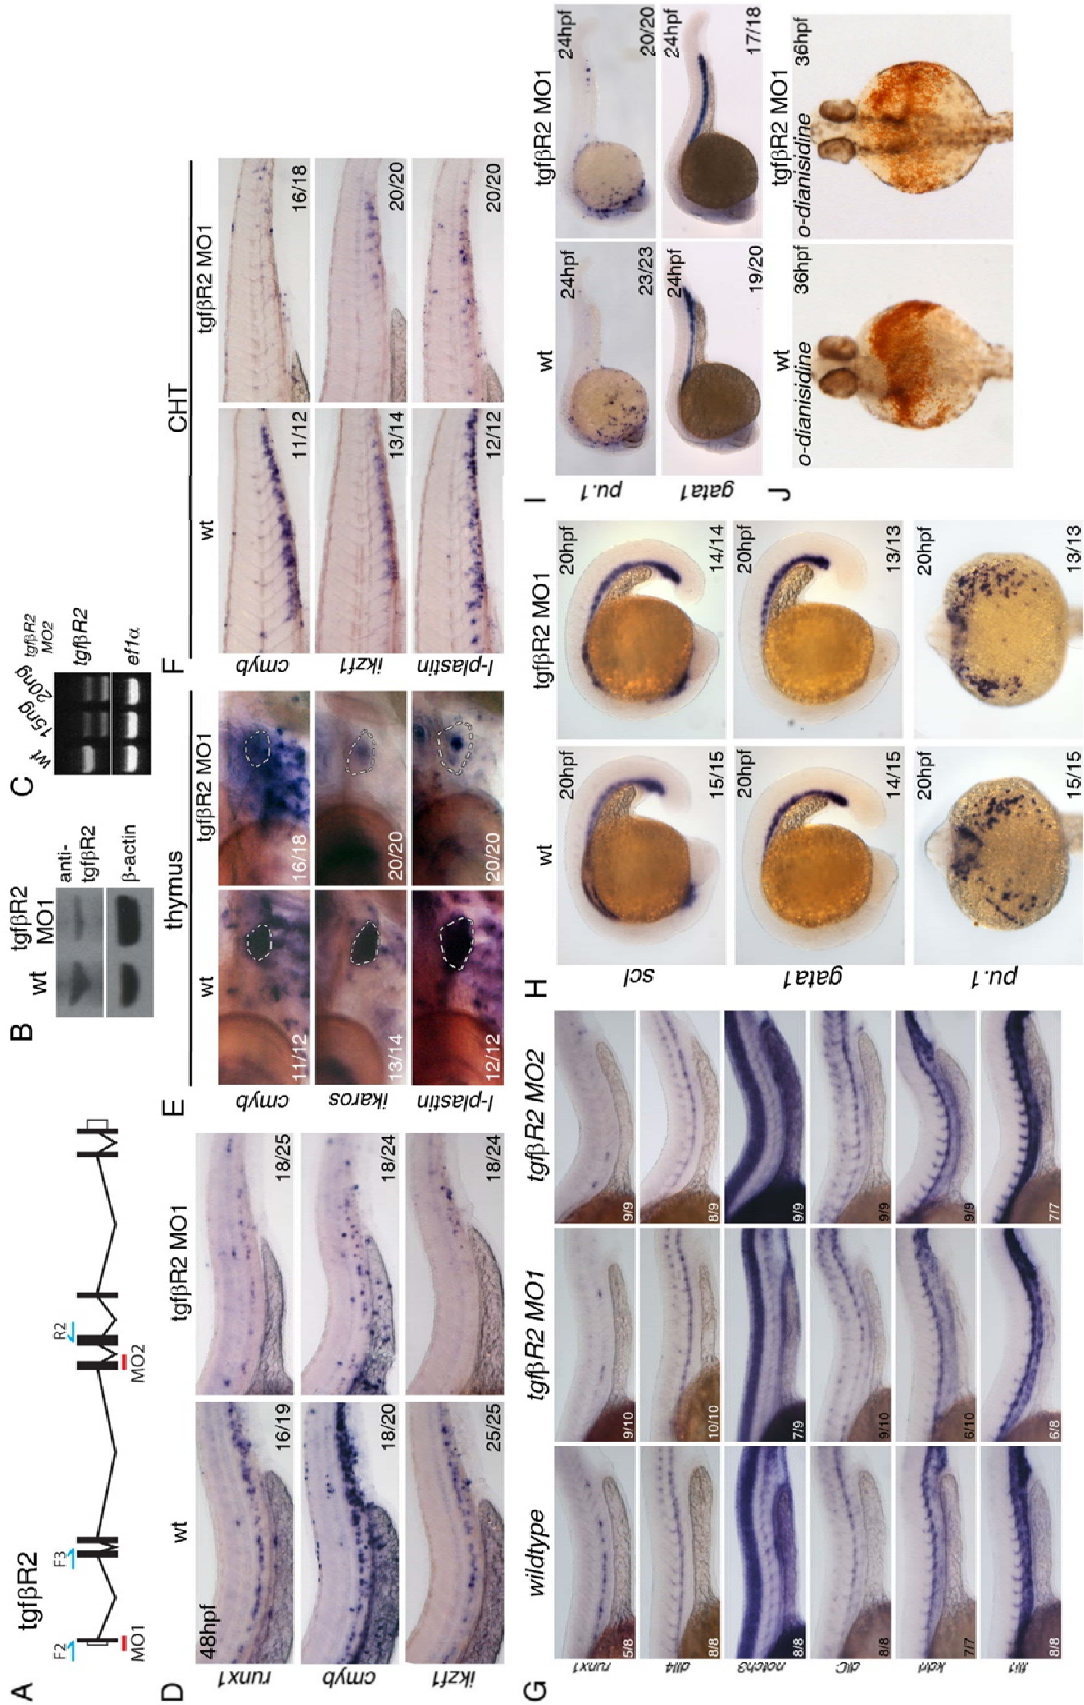

**Figure S2, related to Figure 2** – Further characterization and validation of two independent morpholinos targeting *tgfbR2* and analysis of primitive haematopoiesis in *tgfbR2* morphants. (A) Schematic representation of the genomic organization of the *tgfbR2* gene, location of morpholinos

and primers used to validate the morpholinos. (B) Western blot against Tgf $\beta$ R2 showing a decrease of WT protein induced by the *tgfbR2*<sup>MO1</sup> morpholino. (C) Validation of the *tgfbR2*<sup>MO2</sup> by qPCR on 24hpf cDNA with *tgfbR2* F2/R2 primers (see below). Ef1a PCR was used as a control for the PCR. (D) Expression of *runx1*, *cmyb* and *ikzf1* at 48hpf is reduced in the trunk and CHT of *tgfbR2* morphants. Expression of *cmyb*, *ikzf1* and *I-plastin* is severely reduced (E) in the thymus and (F) in the CHT of *tgfbR2* morphants at 4dpf. (G) Characterisation of the *tgfbR2* MO1 and MO2 morpholinos. *Runx1* expression is decreased upon injection of either morpholino, whereas the arterial markers *dll4*, *notch3* and *dIC* and the vascular markers *kdrl* and *fli1* are grossly normal. (H) Expression of *scl*, *gata1* and *pu.1* is indistinguishable between wildtype and *tgfbR2* morphant embryos at 20hpf. (I) Expression of the primitive hematopoietic markers *gata1* and *pu.1* is unaffected in *tgfbR2* morphants at 24hpf. (J) *tgfbR2* morphants show a slight reduction in o-dianisidine staining at 36hpf. Numbers of embryos analysed are shown in each panel as number of affected embryos/total observed.

Figure S3

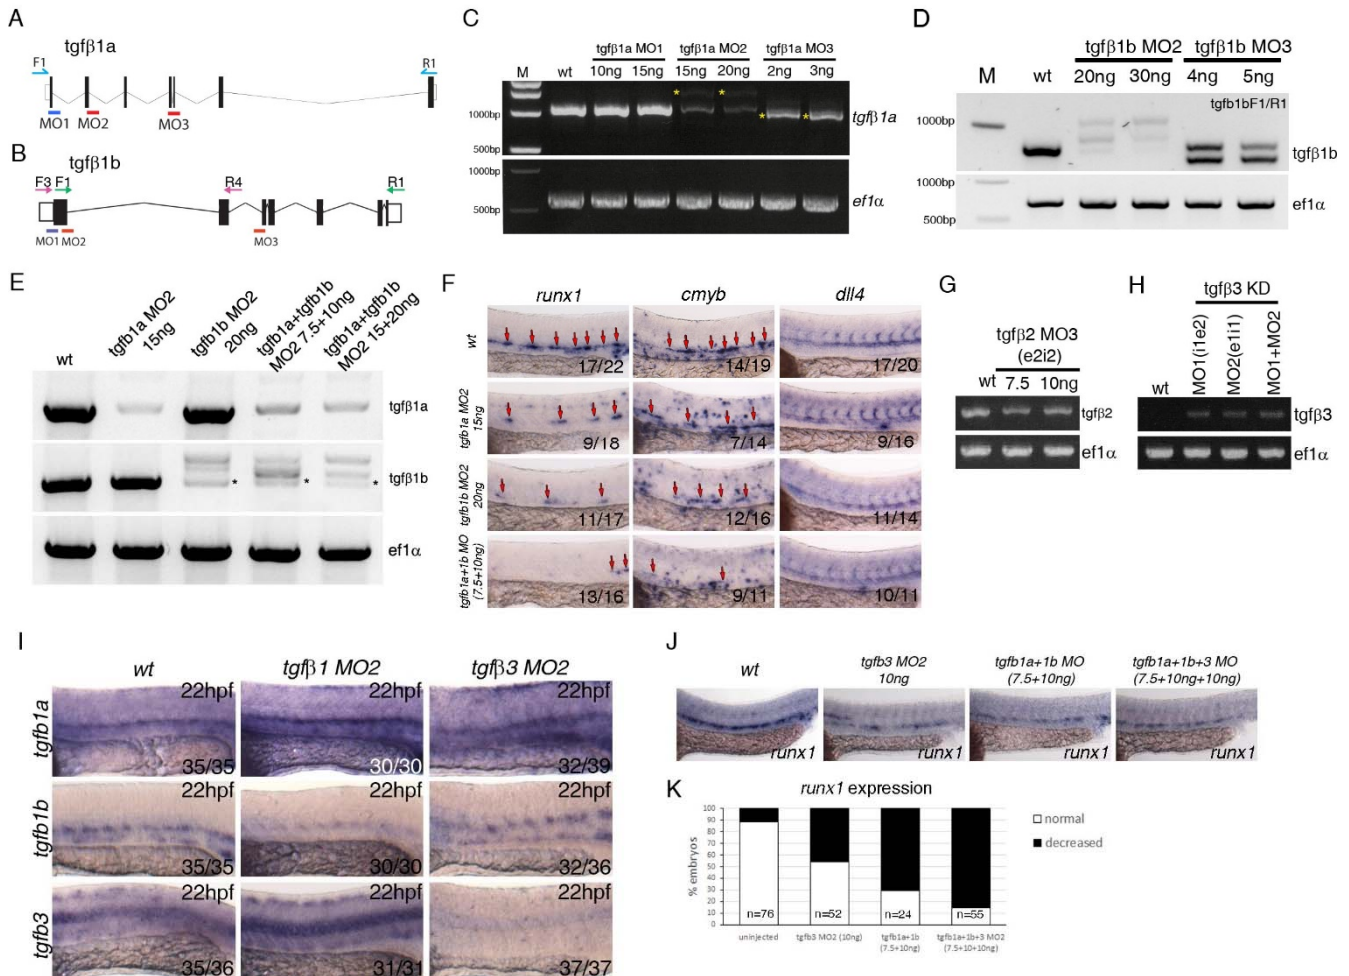

**Figure S3, related to Figure 3** – Validation of morpholinos targeting *tgfb1a*, *tgfb1b*, *tgfb2* and *tgfb3* and further characterization of the phenotype. (A) Schematic representation of the genomic organization of the *tgfb1a* gene, location of morpholinos and primers used to validate morpholino activity. (B) Schematic representation of the genomic organization of the *tgfb1b* gene, location of morpholinos and primers used to validate morpholino activity. (C) Validation of the activity of the *tgfb1a* morpholinos by PCR. Yellow asterisk marks PCR products generated as a result of aberrant splicing induced by the *tgfb1a* morpholinos MO2 and MO3. We have used *tgfb1a*<sup>MO2</sup> in all of the subsequent analysis. (D) Validation by PCR of the activity of two antisense morpholinos targeting *tgfb1b*. Clear aberrant splicing was induced by *tgfb1b* morpholinos MO2 and MO3. We have used *tgfb1b*<sup>MO2</sup> in all of the subsequent analysis. (E) Validation by PCR of the *tgfb1a*<sup>MO2</sup>+*tgfb1b*<sup>MO2</sup> combination. Asterisk marks the remainder of the normally spliced *tgfb1b* gene product. (F) Testing the *tgfb1a*+*tgfb1b* MO2 combinations by *in situ* hybridisation against HE markers *runx1*, HSPC marker *cmyb* and arterial marker *dll4* at 28hpf. The combination of *tgfb1a*+*tgfb1b* MO2 (referred to

in the main text as *tgfb1<sup>MO</sup>*) was used at 7.5 ng/ $\mu$ l +10ng/ $\mu$ l throughout the manuscript. Numbers of embryos analysed are shown in each panel as number of affected embryos/total observed. (G) Validation by PCR of the activity of a morpholino targeting *tgfb2*. (H) Validation by PCR of the activity of two published morpholinos (Cheah et al, 2010) targeting *tgfb3*. *Tgfb3<sup>MO2</sup>* was used in all of the subsequent analysis. (I) Expression of *tgfb1a*, *tgfb1b* and *tgfb3* in *tgfb1<sup>MO2</sup>* and *tgfb3<sup>MO2</sup>* at 22hpf. *tgfb1<sup>MO2</sup>* morphants show an increase in *tgfb1a* and *tgfb3* and a decrease in *tgfb1b*; *tgfb3<sup>MO2</sup>* morphants show a dramatic loss of *tgfb3* expression. Numbers of embryos analysed are shown in each panel as number of affected embryos/total observed. (J,K) Comparison and quantification of the *runx1* expression in the DA upon single *tgfb3<sup>MO2</sup>*, *tgfb1<sup>MO2</sup>* or combined *tgfb3<sup>MO2</sup>+tgfb1<sup>MO2</sup>*, showing increased severity of the phenotype in the triple morphants as compared to single morphants. The numbers of embryos analysed are shown in the graph in (K).

Figure S4

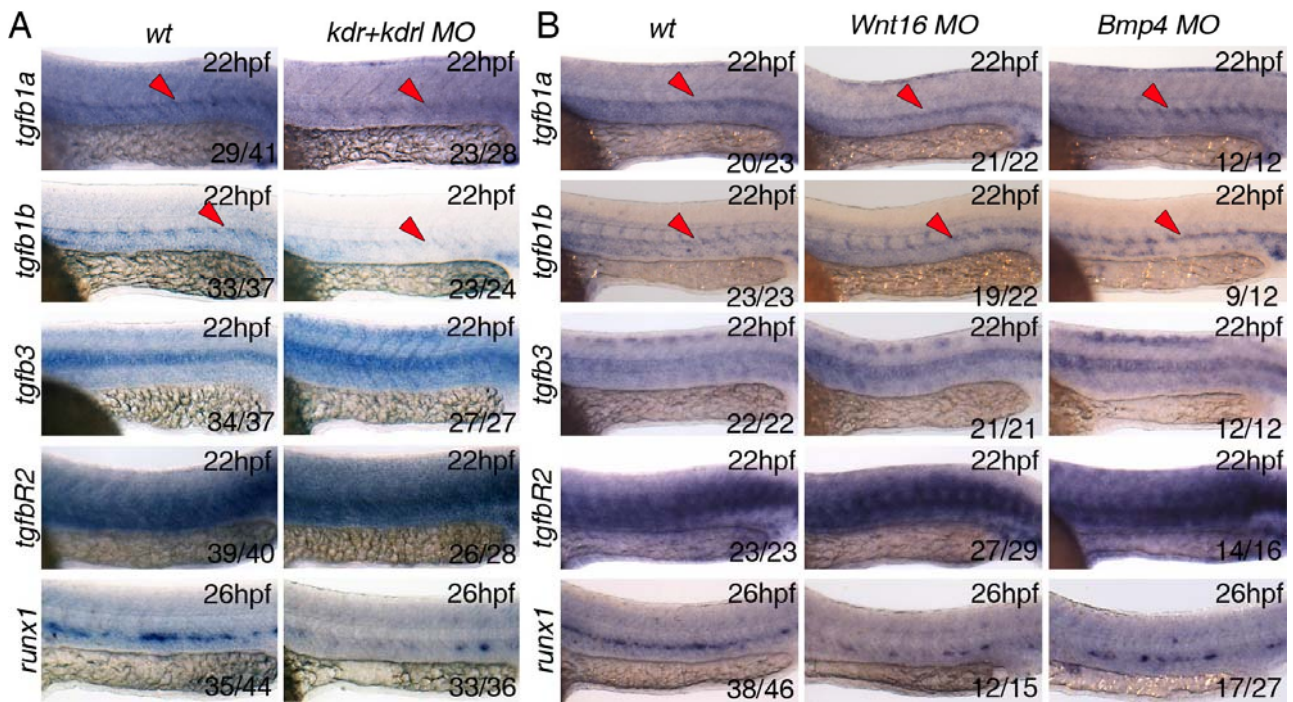

**Figure S4, related to Figure 4** – Inhibition of Vegf (*kdr+kdr1<sup>MO</sup>*), Wnt (*Wnt16<sup>MO</sup>*) or BMP (*BMP4<sup>MO</sup>*) signalling pathways by morpholino oligonucleotides. All *in situ* hybridisation experiments were performed at 22hpf except for the *runx1* probe, performed at 26hpf. (A) Loss of Vegf signalling upon morpholino knockdown of the Vegf receptors *kdr* and *kdr1* (Bahary et al, 2007) results in decreased expression of *tgfb1a* and *tgfb1b* in the dorsal aorta (DA). *Runx1* expression in the DA was used as a positive control for the experiment. (B) Loss of Wnt signalling or BMP signalling by morpholino knockdown of Wnt16 (Clemens et al, 2011) or BMP4 (Chocron et al, 2007) showed no effect of expression of TGFβ ligands or receptor. *Runx1* expression in the DA was used as a positive control for the experiment. Numbers of embryos analysed are shown in each panel as number of affected embryos/total observed.



Figure S5

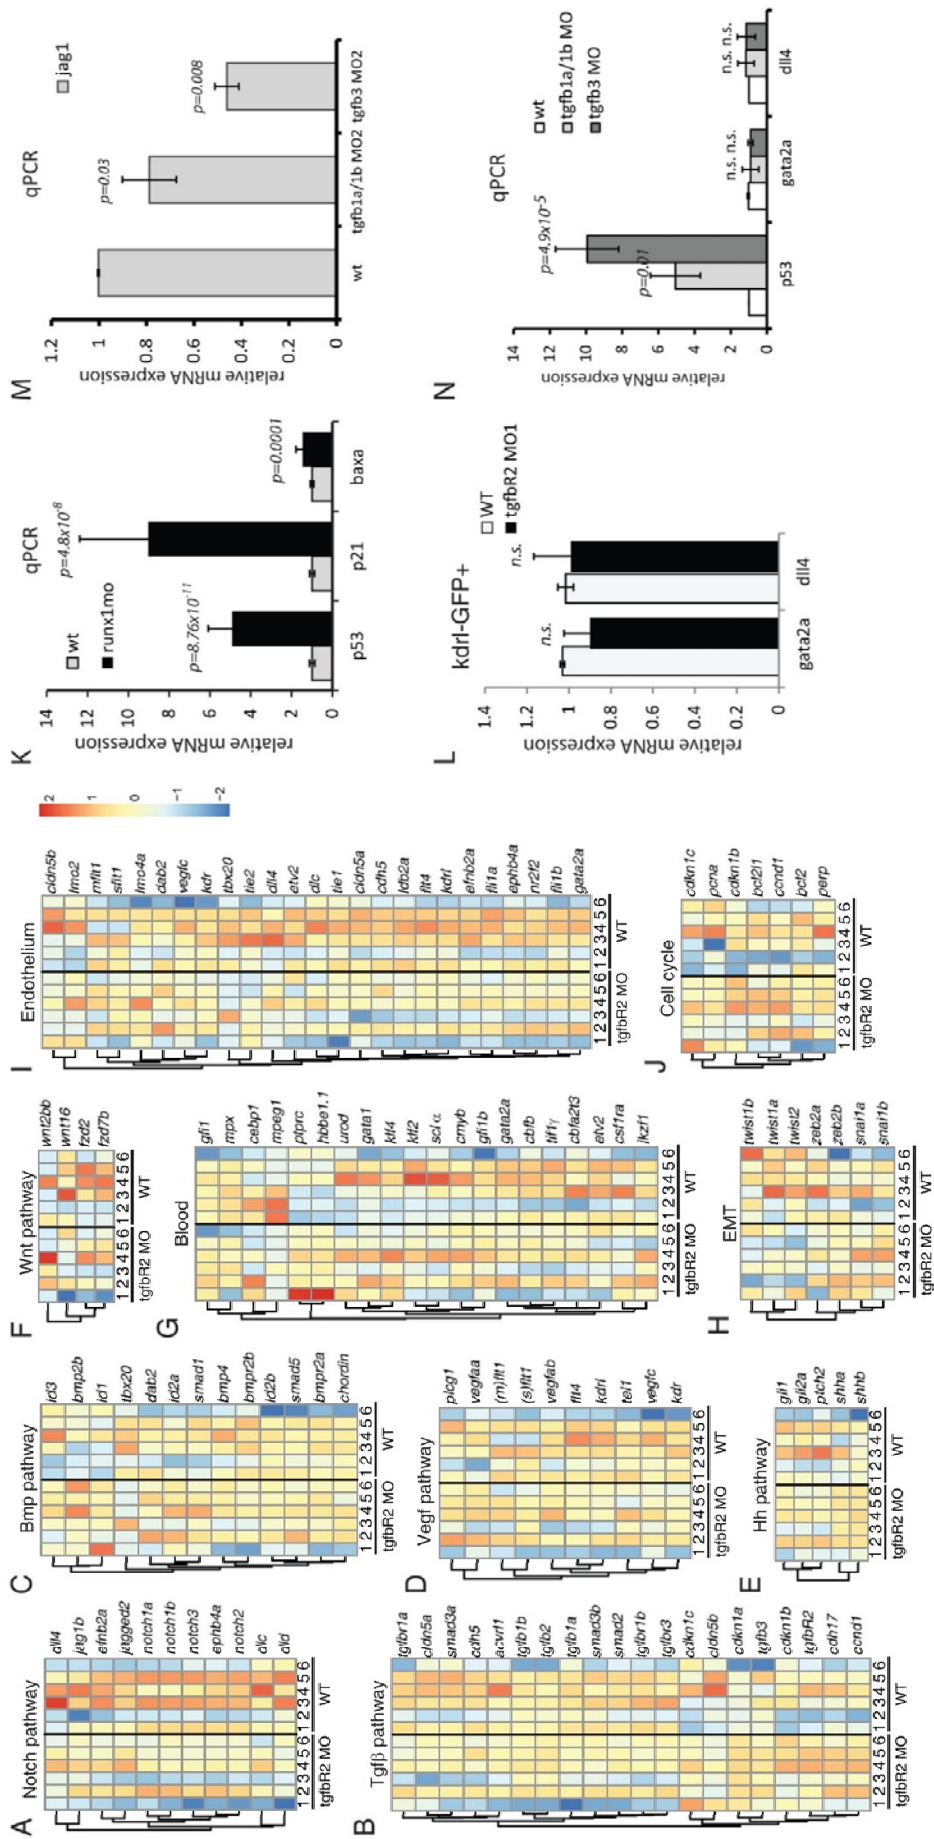

**Figure S5, related to Figure 1 and Table S1** – Multiplex analysis of the gene expression profile in *tgfbR2* morphant embryos of a custom Probe Set (132 genes) using Nanostring (see Supplementary Experimental Procedures and Table S1). The custom designed probes include genes that belong to known pathway or processes that affect endothelial or hematopoietic cell programming, fate or survival, as well as six housekeeping genes. All genes shown here displayed no significant changes in expression upon *tgfbR2*<sup>MO1</sup> knockdown (see Figure 5 for differentially expressed genes). Each column represents one sample in a total of six wt and six *tgfbR2*<sup>MO1</sup> replicate morpholino injections (A) Notch pathway genes. (B) TGFβ pathway. (C) BMP pathway. (D) Vegf pathway. (E) Hedgehog pathway. (F) Wnt pathway. (G) Blood: genes expressed mostly in HSPCs, erythroid or myeloid cells. (H) Genes with known roles in epithelial to mesenchymal transition (EMT). (I) Gene expressed in endothelial cells (J) Cell cycle: genes that mark proliferation or apoptosis. Note that expression data is repeated for some genes as they fall into more than one category. (K) *p53*, *cdkn1a* and *baxa* are upregulated in *runx1* morphants. Trunks from 20 wild type and 20 *runx1* morphant embryos at 27hpf were dissected and the cDNA analysed by qPCR. The data represents the average of 4 biological replicates and were normalised to *gapdh*. (L) qPCR in kdrl-GFP<sup>+</sup> endothelial cells confirms that neither *gata2a* nor *dll4* expression were affected by *tgfbR2* morpholino knockdown at 26hpf. (M) qPCR for *jag1a* in *tgfb1* and *tgfb3* morphants at 28hpf. (N) *p53* but not *gata2a* or *dll4* expression are affected in *tgfb1* (*tgfb1a* MO2+ *tgfb1b* MO2) or *tgfb3* morphants. qPCR results are shown as the average (±s.d.) of 3-6 biological replicates. Expression levels were normalized to *bactin2* and *ef1a*. *p* values are shown on the graphs. n.s.- not significant.

Figure S6

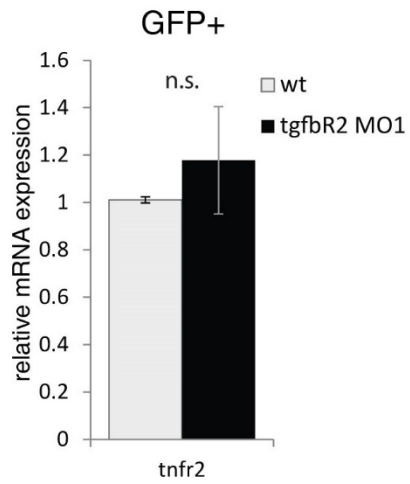

**Figure S6, related to Figure 6** – qPCR analysis of *tnfr2* expression. *tnfr2* expression is unaffected in kdrl-GFP<sup>+</sup> endothelial cells at 26hpf in *tgfbR2* morphants. qPCR results are shown as the average ( $\pm$ s.d.) of 3 biological replicates; each biological replicate was done in triplicate. Expression levels were normalized to *bactin2* and *ef1a*. n.s.- not significant.

**Supplemental Table S1 (excel file), related to Figure 5** - Mean Expression Values of the Data Analysed with the NanoStringNorm Package Sorted by Increasing P Value. The Top 9 Genes ( $P < 0.05$  and absolute  $\log_2FC > 0.5$ ) are Highlighted. Eight of the Probes Failed and were not Considered in the Analysis.

## Supplemental Experimental Procedures

### ***Morpholinos, RNA and DNA injections and chemical inhibitors***

To assess the role of TGF $\beta$  signalling in definitive haematopoiesis, we designed MOs targeting either the 5'-end or a splice site of *tgfbR2*, *tgfb1a*, *tgfb1b* and *tgfb2* (see below; Fig. S2,S3). For splice blocking MOs, correct targeting was validated by PCR on cDNA from morphant embryos (Fig. S2, S3) using the primers indicated (see below). We validated the phenotypes induced by translation blocking MOs by comparing them against those induced by splice MOs for *tgfbR2*, *tgfb1a*, *tgfb1b* (Fig. S2,S3, data not shown). For *tgfb2*, both MOs yielded the same phenotype (data not shown) but only *tgfb2*<sup>MO3</sup> could be validated by PCR (Fig. S3G) so all experiments were done with *tgfb2*<sup>MO3</sup>. For *tgfbR2*<sup>MO1</sup>, the phenotype was further verified by western blot against Tgf $\beta$ R2 (Fig. S2B).

To investigate whether the Notch or Vegf pathways regulated the transcription of TGF $\beta$  ligands, we treated wildtype embryos with DMSO (control), the  $\gamma$ -secretase inhibitor inhibitor DAPM (565777, Calbiochem) or the Vegf inhibitor DMH4 (D8696, SIGMA) from tailbud stage until collection at 22hpf or 28hpf for analysis by in situ hybridization, at concentrations specified in the figures. To interrogate *kdr1*, *tgfb1a* and *tgfb1b* gene expression in endothelial cells of DMH4-treated embryos, treated and untreated Tg(Fli1a:gf) embryos were dissociated and GFP<sup>+</sup> cells isolated and processed for mRNA extraction with the RNEasy Micro kit (Qiagen) as described (Monteiro et al., 2011). cDNA was synthesized from total RNA using a Superscript III RT-PCR enzyme (Invitrogen) following the manufacturer's instructions. The primers used for quantitative real-time PCR (qPCR) are shown in below. Fold changes in gene expression were calculated using the  $2^{-\Delta\Delta C_t}$  method (Livak and Schmittgen, 2001) and normalized to a geometric mean of *bactin2* and *ef1a*.

To rescue the loss of HSC markers in *tgfbR2* morphants we transiently expressed *jag1a* (Ensembl ID: ENSDARG00000030289) in endothelial cells under the control of the *Kdr1* promoter (Jin et al., 2005). The *jag1a* sequence was PCR-amplified from 24hpf embryo cDNA and a C-terminal V5 tag was added

in frame in the 3'end primer (see below for primers). This amplicon was then cloned into a Tol2 destination vector, downstream of the *Kdrl* promoter using the InFusion HD Cloning kit (Takara Clontech). The resulting *Kdrl:jag1a-V5* construct was confirmed by sequencing. Additional details available upon request. The amount of DNA used for the rescue experiment is shown in the figure legends.

### ***Western blotting***

Protein extracts were prepared as described (Link et al., 2006); samples were sonicated in a Bioruptor sonicator (Diagenode) prior to loading on gel. After transfer, membranes were blocked in 5% milk (SIGMA) in Tris-Buffered Saline+0.5%Tween-20 (TBST) for 1h at RT. TgfbR2 protein was detected by a primary anti-tgfbR2 antibody (diluted 1:250 in blocking solution, sc-17792, Santa Cruz). A goat anti-mouse HRP-conjugated was used as a secondary antibody (1:1000 in blocking solution, P044701-2, DAKO) and developed with ImmunoCruz luminol reagent (SantaCruz). Blots were stripped with Invitrogen's stripping buffer, blocked again in 5% milk in TBST and re-probed with an anti  $\beta$ -actin-HRP conjugated antibody (1:35000, A3854, SIGMA).

### ***NanoString expression analysis***

This technology is as sensitive as qPCR but gene expression levels are obtained by counting mRNA molecules that hybridise with specifically tagged probes and does not require amplification (Geiss et al., 2008). We used 100ng of total RNA to hybridise with the capture and reporter probes overnight at 65°C. After the washes, the Target/Probe complexes were eluted and immobilized in the cartridge for data collection in the nCounter Digital Analyzer according to manufacturer's instructions. The raw data was analysed using the NanoStringNorm R package (Waggott et al., 2012). The data was normalised using the geometric mean of the six positive controls and then it was background corrected by subtracting the mean and 2 standard deviations of the eight negative controls. The data was then

normalised for sample/RNA content using the geometric mean of five housekeeping genes (*bactin1*, *bactin2*, *gapdhs*, *sdha* and *ubiC*). Normalised mRNA expression levels were log<sub>2</sub> transformed and analysed using a t-test to identify differentially expressed genes between conditions. The pheatmap package (Kolde, 2013) was used to generate heatmaps. The values used were the scaled per gene normalised values from the NanoStringNorm package (Waggott et al., 2012).

### ***Immunohistochemistry and apoptosis staining***

To evaluate apoptosis in *tgfbR2* morphants, we stained for apoptotic cells using the Click-IT TUNEL<sup>®</sup> Alexa 594 kit (C10246, LifeTechnologies) followed by immunostaining against GFP. Briefly, embryos at the desired stage were fixed for 1h at RT in 4% paraformaldehyde in PBS (PFA), permeabilized in PBS+0.25% TritonX-100 for 20min at RT and then washed twice in deionized water. The TdT and Click-IT reactions were performed according to the manufacturer's instructions. For detection of GFP following the Click-IT reaction, samples were blocked in 3%BSA, 5% goat serum in PBS+0.5% TritonX-100 (PBST) for 1h at RT and incubated overnight at 4°C with a chicken anti-GFP antibody in blocking solution (1:500, ab13970, Abcam). Samples were washed 6x15min in PBST, blocked again in 3%BSA, 5% goat serum in PBST for 1h at RT and incubated overnight at 4°C with a goat anti-chicken Alexa 488 conjugated antibody (1:500, A-11039, Invitrogen). Following 6x15min washes in PBST, the embryos were mounted in Vectashield<sup>®</sup> and imaged in an LSM780 confocal microscope with a LD C-Apochromat 40x/1.1 W objective.

## Morpholinos, primers and NanoString probes

Antisense Morpholino Oligonucleotides (MOs) Used in this Study.

| Gene          | Ensembl ID         | MO name           | MO type    | MO sequence (5'→3')              | amount injected                     | published                         | comments            |
|---------------|--------------------|-------------------|------------|----------------------------------|-------------------------------------|-----------------------------------|---------------------|
| <b>tgfbR2</b> | ENSDART00000039832 | tgfbR2 MO1        | ATG        | ATATCGCTCCATTAGAAACGCAGTC        | 12.5ng                              | this study                        |                     |
|               |                    | tgfbR2 MO2        | e4i4       | ATATTAAGTTGTCTCCTGACCTGCA        | 10ng                                | this study                        |                     |
| <b>tgfb1a</b> | ENSDART00000060839 | <b>tgfb1a MO1</b> | <b>ATG</b> | <b>CAGCACCAAGCAAACCAACCTCATA</b> | <b>10ng</b>                         | <b>this study</b>                 | <b>did not work</b> |
|               |                    | tgfb1a MO2        | e2i2       | TGGTGCAACAATCACCTCACCTGAA        | 15ng                                | this study                        |                     |
|               |                    | tgfb1a MO3        | e4i4       | GGACAGCAAAAAGACTTACTCATCA        | 2ng                                 | this study                        |                     |
| <b>tgfb1b</b> | ENSDART00000028981 | tgfb1b MO1        | ATG        | GTAATAAACTCTCCGCCTTCATGGT        | 1ng                                 | this study                        |                     |
|               |                    | tgfb1b MO2        | e1i1       | AAGGATAGTGCCACTCACTATTGT         | 20ng                                | this study                        |                     |
| <b>tgfb2</b>  | ENSDARG00000027087 | tgfb2 MO1         | ATG        | GGAGGCTCAAGACGTACAAGTTCAT        | 5ng                                 | this study                        |                     |
|               |                    | tgfb2 MO3         | e2i2       | AAAGGGACTTTGGATTTACCTGGTA        | 7.5ng                               | this study                        |                     |
|               |                    | tgfb3 MO2         | splice     | CATCATCCCTAAGGGAACTTACTG         | 17ng                                | (Cheah et al., 2010)              |                     |
| <b>kdrl</b>   |                    | Kdrl MO           |            | CCGAATGATACTCCGTATGTCACTT        | 4.5ng (in combination with kdr MO)  | or MO2 kdrl (Bahary et al., 2007) |                     |
| <b>kdr</b>    |                    | Kdr MO            |            | GTTTTCTTGATCTCACCTGAACCCT        | 4.5ng (in combination with kdrl MO) | or MO1 Kdrb (Bahary et al., 2007) |                     |
| <b>bmp4</b>   |                    | bmp4 MO           | splice     | GGTGTGTTGATTGTCTGACCTTCATG       | 2ng                                 | (Chocron et al., 2007)            |                     |
| <b>wnt16</b>  |                    | wnt16 MO          |            | AGGTTAGTTCTGTACCCACCTGTC         | 5ng                                 | (Clements et al., 2011)           |                     |
| <b>runx1</b>  |                    | runx1 MO          | splice     | AGCGCTCTTACCGTATTTGGCGTCC        | 5ng                                 | (Gering and Patient, 2005)        |                     |
| <b>jag1a</b>  |                    | jag1a MO          | splice     | AAGCCAAACCCGCACATACCCGCAT        | 6ng                                 | (Yamamoto et al., 2010)           |                     |



Primers Used in this Study.

| Gene            | Accession number /Ensembl ID                             | primer name          | primer sequence                                 | purpose                                          | anti-sense linearisation | in vitro trans-cription |
|-----------------|----------------------------------------------------------|----------------------|-------------------------------------------------|--------------------------------------------------|--------------------------|-------------------------|
| <b>tgfb1a</b>   | Accession:NM_182873                                      | tgfb1a F1            | TCAGACGCTTTTCGATCCTT                            | generate in situ probe; test splice MO           | ApaI                     | Sp6                     |
|                 |                                                          | tgfb1a R1            | AGGACCCCATGCAGTAGTTG                            |                                                  |                          |                         |
| <b>tgfb1b</b>   | Ensembl ID:ENSDARG00000034895 (ENSDART00000028981)       | tgfb1b F1            | GCACACCATAGAAGATCCAAC A                         | generate in situ probe; test splice MO           | ApaI                     | Sp6                     |
|                 |                                                          | tgfb1b R1            | TGACAACTGTTCCACCTTATGC                          |                                                  |                          |                         |
| <b>tgfb2</b>    | Accession:NM_194385<br><br>Ensembl ID:ENSDART00000030271 | tgfb2 F1             | GTTCAGAAGAAGCGGATCG                             | generate in situ probe                           | SpeI                     | T7                      |
|                 |                                                          | tgfb2 R1             | GGGGTCTTGCCGATGTAGTA                            | verify splice MO                                 |                          |                         |
|                 |                                                          | tgfb2 F2             | GTTCAGAAGAAGCGGATCG                             |                                                  |                          |                         |
| <b>tgfb3</b>    | Accession:NM_194386<br><br>Cheah et al, 2010             | tgfb3 F1             | TGGCTGACAAACAGAGCAAC                            | generate in situ probe                           | ApaI                     | Sp6                     |
|                 |                                                          | tgfb3 R1             | CTGCCGTGTGACAGAGGTAA                            | to verify splice MO (362bp in MO, but not in WT) |                          |                         |
|                 | Cheah et al, 2010                                        | tgfb3 F2             | TCACACTTAGTTCATGTTAG                            |                                                  | qPCR                     |                         |
|                 |                                                          | tgfb3 R2             | TGTCTGCGCTCCACAGATAC                            |                                                  |                          |                         |
|                 |                                                          | tgfb3 R4             | GGCAGTAGGGCAGGTCATTG                            |                                                  |                          |                         |
| <b>tgfbR 2</b>  | Accession:NM_182855<br><br>Ensembl ID:ENSDARG00000034541 | tgfbr2 F1            | CACACATGCCAACAACATCA                            | generate in situ probe                           | ApaI                     | Sp6                     |
|                 |                                                          | tgfbr2 R1            | TCTCATTTGTCGTCGCTCAC                            | verify splice MO                                 |                          |                         |
|                 |                                                          | tgfbr2 F2            | TCAGTCCGGATCACACGATA                            |                                                  |                          |                         |
|                 |                                                          | tgfbr2 R2            | CGACAGCGAGTTGTCCAAC                             | verify splice MO                                 |                          |                         |
| <b>gata2 b</b>  |                                                          | gata2b F1            | ATGATGGATGCCCCAGCG                              | generate in situ probe                           | SacI                     | T7                      |
|                 |                                                          | Gata2b R1            | TCAGCCTATAGCAGTGACTAAGC                         |                                                  |                          |                         |
| <b>jag1a</b>    | Yamamoto et al, 2010                                     | jag1a F5<br>jag1a R5 | GACAGACAAACCGGGATGAT<br>CACCGCTTCTCGATCACTT     | verify splice MO                                 |                          |                         |
| <b>rspo1</b>    | Ensembl ID:ENSDARG00000039957                            | rspo1 F5             | AGAAGCTCTACTCCATGGCTTG                          | qPCR                                             |                          |                         |
|                 |                                                          | rspo1 R5             | GACAGAGGCCTGGTTTATTTTG                          |                                                  |                          |                         |
| <b>baxa</b>     | (Danilova et al., 2011)                                  | Bax F1               | CGTCGGGTGGAGGCGATACG                            | qPCR                                             |                          |                         |
|                 |                                                          | Bax R1               | GAGTCGGCTGAAGATTAGAGTT                          |                                                  |                          |                         |
| <b>baxa*</b>    | Accession:NM_131562                                      | Bax F2<br>Bax R2     | GGAGATGAGCTGGATGGAAA<br>GAAAAGCGCCACAACCTCTTC   | qPCR                                             |                          |                         |
| <b>p53</b>      | Accession:NM_001271820                                   | p53 F1<br>p53 R1     | TTAAGTGATGTGGTGCCTGCCT<br>AGCTTCTTCCCTGTTTGGGCT | qPCR                                             |                          |                         |
| <b>ef1a</b>     | (Bertrand et al., 2008)                                  | ef1a-F1<br>ef1a-R1   | GAGAAGTTCGAGAAGGAAGC<br>CGTAGTATTGCTGGTCTCG     | qPCR                                             |                          |                         |
| <b>bactin 2</b> | Ensembl ID:ENSDARG00000037870                            | bactin2 F1           | GGACCTGTATGCCAACAACACTGT A                      | qPCR                                             |                          |                         |
|                 |                                                          | bactin2 R1           | ATGTGATCTCCTTCTGCATCCT                          |                                                  |                          |                         |
| <b>gapdh</b>    | (Simoes et al., 2011)                                    | gapdh F1             | GGTCATTGATGGTCATGCAAT C                         | qPCR                                             |                          |                         |
|                 |                                                          | gapdh R1             | CACCTGCATCACCCCACTTA                            |                                                  |                          |                         |
| <b>taz</b>      | Ensembl ID:ENSDARG00000041421                            | taz F1               | GGAGAATATCCAGCCGAGTG                            | qPCR                                             |                          |                         |

|                     |                                  |                                                           |                                                                                                                                                                              |                                         |
|---------------------|----------------------------------|-----------------------------------------------------------|------------------------------------------------------------------------------------------------------------------------------------------------------------------------------|-----------------------------------------|
|                     | Ensembl<br>ID:ENSDART00000138805 | taz R1                                                    | TGCACCATCAGCGAGTTAAA                                                                                                                                                         |                                         |
| <b>cdkn1<br/>a</b>  | Ensembl<br>ID:ENSDART00000136722 | cdkn1a<br>F1<br>cdkn1a<br>R1                              | AAGTGGAGAAAACCCAGAGA<br>TAGACGCTTCTGGCTTGTA                                                                                                                                  | qPCR                                    |
| <b>cdkn1<br/>a*</b> | Ensembl<br>ID:ENSDART00000136722 | cdkn1a<br>F2<br>cdkn1a<br>R2                              | AACGCTGCTACGAGACGAAT<br>CGCAAACAGACCAACATCA                                                                                                                                  | qPCR                                    |
| <b>cdkn1<br/>b</b>  | Ensembl<br>ID:ENSDART00000076417 | cdkn1b<br>F1<br>cdkn1b<br>R1                              | ACGGGAATCACGACTGTAGG<br>CACGATGAGTCGAGACAGGA                                                                                                                                 | qPCR                                    |
| <b>jag1a</b>        | Ensembl<br>ID:ENSDART00000137172 | jag1a F3<br>jag1a R3<br>jag1a<br>kozak F<br>jag1a V5<br>R | ATTGGTGGATACTTCTGCGAG<br>T<br>CCATTCACCAGATCCTTACACA<br>GCCACCATGATTCTCAGACCGA<br>GCGC<br>CTACGTAGAATCGAGACCGAG<br>GAGAGGGTTAGGGATAGGCTT<br>ACCTACGATATACTCCATTTTC<br>TGCAAG | qPCR<br>amplify jag1a+C-terminal V5 tag |
| <b>gata2</b>        | Accession:NM_131233              | gata2 F3<br>gata2<br>R3                                   | GGACGAAAAGGAGTCCATCA<br>GCACTCATAGCCAAGCTTC                                                                                                                                  | qPCR                                    |
| <b>dll4</b>         | Ensembl<br>ID:ENSDARG00000070425 | dll4 F4<br>dll4 R4                                        | ACGCATACAACCCTAACATGC<br>CTCTGTCTGCTTCCCACTTG                                                                                                                                | qPCR                                    |
| <b>tnfr2</b>        | (Espin-Palazon et al., 2014)     | tnfr2 F<br>tnfr2 R                                        | CACACAAGAGATCCGAAGCA<br>GGCATCTGTGATGGGAACT                                                                                                                                  | qPCR                                    |

\*primers used for qPCR experiment shown in Figure S5K.

Sequence of the NanoString Probes Used in this Study.

| Pathway                         | gene name      | accession number                                                                                  | target sequence                                                                                      |
|---------------------------------|----------------|---------------------------------------------------------------------------------------------------|------------------------------------------------------------------------------------------------------|
| <b>VegfA signalling</b>         | vegfaa         | NM_131408.3                                                                                       | TATTTCTCGGGCTCTCTCCATCTGTCTGTGTAAGAGCTGCCACATACCCAAAGAGGGGAAAGAGCAAAATGATGTATTCCCTCATGGATGT          |
|                                 | vegfab         | NM_001044855.2                                                                                    | ATGGACTAAAAGTACGCATGGATATCGCCTCTCTCTCAGCGCCTTTGTGTTCACTGATATCTCTGTATACTCCGCTAATAACACAGTGTGGCAATAC    |
|                                 | VegfC          | NM_205734.1                                                                                       | TCAGCAAGACGTTGTTTGAATAACAGTTCAGTCAAGCAAGGACAAACCGGTACCATAAGCTTCGCAACACACATCTCTGACGCTGTTGTCAA         |
|                                 | kdrl (flk1)    | NM_131472.1                                                                                       | AACATACCCAAACCAAAAGCTTATCCTTGAGACGCAGATGAATCCTATGGCAGATGATGTTAAAGAGGGGTACAGTGGGATCCAAAAAGGTTTCCAG    |
|                                 | kdr            | NM_001024653.2                                                                                    | GCCCTATTGAAGGACAGGATGTTATAATCGTGTGTAGCAGACCGGCTGCTACTATACTTCCGCTGGTATCGGGTAGCAATATAGCAACCATGA        |
|                                 | mflt1          | NM_001014829.2                                                                                    | GAAGCACTGGTTCTGGCATCTATCGCTGTGCACATCAACATATTAGGAGAGATGAACCTAGACATTCCTTTCTATGTACAGATGTCAAAGAGGCC      |
|                                 | sflt1          | NM_001257153.1                                                                                    | CAGTCTCCAGCAGCGTATTGTCCTCCGCTCTCAAACGTGGCAGACCTCCGCTCTCAGGAGCTGATCTATTCTGAGAGTCCCTGATCCACACAC        |
|                                 | flt4           | NM_130945.1                                                                                       | TCCTGACCTAAAAGTCACTCTCTCTGTTAGTCCGTATCCAGGACCTGGATGGCAGTGTGGTCACTGGAATAATAAAAGGGTGTGGTCCATCCC        |
|                                 | plcg1          | NM_194407.1                                                                                       | TTTTACGCACTGGATCGTAACCGAGAGGACAGAAATTCCTGTAAGGATCTGAAATGTATGTTGTGTCAGGTCACACAGAGTCCCAACATGAAGTTCC    |
|                                 | tel1           | NM_001044968.1                                                                                    | CCTGGTGGAACTAGTGGACTTTCCGAAAGAGCCGCTGTATGCAAAAAACAACTCGCTACTCTGTACACCAGAAGTATAGAGCGCTTCAGTTCCG       |
|                                 | cbfa2t3        | ENSDART0000021009.2                                                                               | GCAACACTGCACGTTACTGTGGCTCTTCTGCAGCAAGGACTGGGAGAAACACCTATGATGCGCCAGGGTCTGCCTAGCAGTAGCGAGAGCAC         |
| <b>Notch signalling</b>         | notch1a        | NM_131441.1                                                                                       | CAACTCTGATGATTGCATCTCAGCGTGTCTCAACGGAAAATGCATCGACAAAATCAACTCGTTCAGTCCGAAATGCCCTAAAGGGTTTTCTGGGAGT    |
|                                 | notch1b        | NM_131302.2                                                                                       | GCCCGAGCAATCAAGTAGAACAATGAGATTGCTAAATGAAGGCACATCCATAAGCCTGCTTATCTGAAGGGTCTTTATATGCCGCTGTACTAACCT     |
|                                 | notch2         | NM_001115094.1                                                                                    | CCATTCCGGATTCTGTTTACAGCCTCTCGATCTGAGGCAATGTTACCATGAACGATCACACTGCCAAAAGTAAAGAGTCTCATTTTGGGGTACTG      |
|                                 | notch3         | NM_131549.2                                                                                       | TCAAACAGCTTGGAGCTCATAAGTCCCAATGATTACCAATGTGTGTGCAAACTGGCTTACAGGACAGGGGTCAAAGTAGATTACAGCGTGTGGC       |
|                                 | dll4           | NM_001079835.1                                                                                    | TCACCTTACTCGGATCTACTGTAGACGCATACAACCTAACATCGAGATAAGCTTTTTGGCCATCAAAGAAAGTGAAGTGGGGTGAATGGTCTC        |
|                                 | dlc            | NM_130944.1                                                                                       | GTCAACATTCAGTGGTAACTATTTCCGACATTCCTGACATCGTCAAACTGGTGAAGGACCTTGGTCAAACTCAACCTCAACCTCAACCTCTCGGGT     |
|                                 | dld            | NM_130955.2                                                                                       | AAGGACTGTCCGTAAGCATCATCGAGCCACGAAAGTAAAAACATCAACAAGAAAGTGGACTTTCAGAGCAGCGGCACAAAACGGATTCAATCCG       |
|                                 | jag1a          | NM_131861.1                                                                                       | GATGATTCTCAGACCGAGCGCAACTTTTGGCGCTGTCCGCTCAGTGTCTGTGAGTGTCTGGATGCGGGTATGAGGGTTCGGGGCATTTTCGAG        |
|                                 | jag1b          | NM_131863.1                                                                                       | GGCTTGAGTTCCGAACTGGATCTACGCCGCTTCTGGTGGGAATAAATTTTCGACCAAGGGAACCGCAGTGAAGAAAGTCAAGGATTGTTTACCTTC     |
|                                 | jagged2        | NM_131862.1                                                                                       | TGAAGACCACAATCCCTCCCTTACCAGTCTCCTGTGTGCTGATATAAACCCGAGACCTCGCGTTCATGCTTGTGCTTGAAGATGCTGATATGT        |
|                                 | hey1           | NM_212561.1                                                                                       | AACATCAGACTATTTGAAACAGATGCACAGAAACAGACTTGTACAAAGGGAAGACAGAAATACAGATCCACTCTACTAACCCAGCAGCTGCTTGTCC    |
| hey2 (grl)                      | NM_131622.2    | GGAAATGAAGTTTGAGACCTCATTGACCGCTCGGGGCGTGTCTTCTATTTTTTTTACGGTGGGTGTTCCGAAGCAGGAGCTGGGCGTGAATGTGAG  |                                                                                                      |
| efnb2a                          | NM_131023.1    | ACTTTGGAGTTTGTGATCGCGTGAAGGTGAACCTGTCCCGCGCTCATCTGGACTCCATATACTGGAACACCACGAACCAAGTTTGTGCCGGG      |                                                                                                      |
| ephb4a                          | NM_131414.1    | ACCTTGAACATTCAACAGTAAACACTCGTATTCCGCGATGGAGCTCTTCCAGGAATGTGGCCGGTTTTGGGTTACTCTGCTGGAGTCTCTGCT     |                                                                                                      |
| <b>TGFβ signalling</b>          | tgfb1a         | NM_182873.1                                                                                       | CTGGAACTCGCTTTGCTCCAAAGCACTTGTCAACCGCTGGCTCTATTGACGTGAACAGACAAATGATAGAATGGCTGCAAGGTTTCAGAAAGTGAAG    |
|                                 | tgfb1b         | ENSDART00000134907.2                                                                              | TGCAAGTGTGCTGAAAGCATCATTCCGTTTGGTCTTGTAGGCAAAAGTAAAGAGAAACAACACTACAGGTTGCTGAGACCCAGCACTTTCTGAGGGGA   |
|                                 | tgfb2          | NM_194385.1                                                                                       | AAGTGCACAAGATAGACATCGACCCCTTTACCTTCAGAGAAATGTCATCTTATCAACAATTAACCTACCTCAGGAGGCTGATGTTTGAAGTGAAG      |
|                                 | tgfb3          | NM_194386.2                                                                                       | CGCCTAAAGTGGAGCAGCTTCCAAATGATCGTCAAACTCTGCAAGTGCAGCTGAGAGGTCGGTTTTCAACCTCAACGAGCACAAGGTTCTGGCTT      |
|                                 | eng            | ENSDART00000125008.2                                                                              | GTGCGTTGGTTTTGAAAATGAGGACTGTCAAGCAACATCAATGTGCTGGTGCAGTGTCTGTGAACCTCCAGCGCAGAGTCTCGAGTGTCTGTGTC      |
|                                 | tgfbr3         | ENSDART00000109313.2                                                                              | AGCTCACAGAACGAATTTACCAGTAAACGGACATCATGCGACTATTTGTTCACTGCACCTACCGAAGAACAGGACAGTCCATTGACACCGATGC       |
|                                 | acvr1l         | NM_153643.1                                                                                       | ACGAAAACAGACATGAAGGCTCAGTGTGCTCGCAGTGTCTGTTTTGTTGTTGTTGTTGTTGTTGTTGTTGTTGTTGTTGTTGTTGTTGTTGTTGTTG    |
|                                 | tgfbR2         | NM_182855.2                                                                                       | CTTCAAGCAACCCGATGTACTCTATGGCTTAGTGTGTTGGGAAATCAGTCCAGATGAACCCATCCGAGAGGTTAAAGACTATGAACCTCCATTT       |
|                                 | tgfbr1a        | NM_001037683.2                                                                                    | CAAGGACTGTGTGTTACTGTGAACGATGTGTCAATCGGCTGTGCAACCAACTGGAAGTGTGTTTTCCGCTATCCGCTCAAGTCTTCTGGACAGCCGTA   |
|                                 | tgfbr1b        | NM_001115059.1                                                                                    | CATGAAGCATTTCGAGTCTTCAAGAGGGCTGATATCTACGCCATGGGCTGGTGTCTGGGAGATGCCAGCCGCTGCTCTATCGAGGATTTATCATGAA    |
|                                 | smad1          | NM_131356.1                                                                                       | CCCCGTGCTGGATTGAGATTCACTTTCAGCCCTGCAAGTGGTGGATAAAGTCTCACCGATGGGATCTCTCAACACCCATTTCTCAGTGTCT          |
|                                 | smad2          | NM_131366.2                                                                                       | CTGCAGCCAGTGACTTACTCAGAGCCTGGTTTTGGTGTCTTAGCTTACTACTGAACTTAAACAGCGGGTGGAGAAACATTCCAGCCCTCAGCCTT      |
|                                 | smad3a         | NM_131571.2                                                                                       | CCCACAACAATTTAGATCTACAGCCAGTGCATCTGTGAACAGCAGTGTGGTGTCTATTTCTACTACGAATGAACAGCGAGTAGGAGAAACTTT        |
|                                 | smad3b         | NM_175083.2                                                                                       | ACAGCCTCGGACTCTCAGAGTGTACTTTATCAATACAGGATCCCGATATTGCTGTGGGCAAAACCTGCTGCATACAGTTGAAGCATTGTAAGCGGT     |
|                                 | smad4          | ENSDART0000035478.2                                                                               | AGTTTGACACCCCTGCTTAAAGTAAACATTTAACCGTGTCTTCTGTCAGTCTTCTATAACCAAAAGCTATTTTCTCCTCAGGCGCTTTCACAATGAA    |
|                                 | smad5          | NM_131368.2                                                                                       | CGGTGTCTGAAAACAGAGCAAAAGTGCAGAGTCTACAGCATTCTTGAAGGGATGTGGCTTTCCGAGGGAGGTTGAGAAGTATTGAAAAA            |
|                                 | claudin5a      | NM_213274.1                                                                                       | TCTACATCTCAGCGCCATCTCTGCTGTGCGCACTGTGCTGGATGGCCAATAATATCATCTCCGACTCTATAACCCGACAGTGTGCCCCCGCAGAA      |
|                                 | claudin5b      | NM_001006044.1                                                                                    | TTTCTGCATGTCTGGAGATTGTTGACTGCTGTGACCGTACCCGGGACTCTTTGTTGATGGTAGGCTGTGGGTTGCCATGTGAAAGTGTCCGCTT       |
|                                 | id1            | NM_131245.1                                                                                       | GACAACCTCAACAAGCTTTAAAGGAGTACGACGACTCGCTCAGCTATTCTCTTTGACTCTGCAAAATGACCAAAATGAAAGTTGGGAGCTAC         |
|                                 | ld2a           | NM_201291.1                                                                                       | ATATGTGCAAGCATGACTTGCCTTTTATCTCAGGACTCTGAAGCATGTCACTGAACTTCAAGTCACTGCACTGCACTGCACTGCACTGCACTGCACT    |
|                                 | ld2b           | NM_199541.1                                                                                       | ACAGATGACTCATAGCCCTGTCTGTTGAAATGGTGAAGTATTGATCTTCTGCTTTGACAAGCAAGTAAACTTTTGCACGTGGGGCAGTTTGTCTG      |
|                                 | id3            | NM_152967.1                                                                                       | AAACGAGACAGACACAAAACAGCCTGACATTTCTGTCAATGAAGAAGTCAAGATGAGCCGTAATTTCTCAAAGAAAGATGAGGACTATGGCCAT       |
|                                 | zeb2a          | NM_001135104.1                                                                                    | ATATGATTCTTAAACGTAACAAGTCTTAAAGTTGGCCAGGGGTGGAGGAAAGAGTCTGGGTAACATTTAGACGGAGGCTCATTTGATGAGGCAATGTGAC |
| zeb2b                           | NM_001245966.1 | ACTGGATCGGAGACGGAAGAAGACAGACTTTGGTATCGGAGGAGGAGCCTTTGCTTAAATGGGCGGGAGTCCGCGACCTTGTCAATCATGAGT     |                                                                                                      |
| twist1a                         | NM_130984.2    | GATGCACGCTTTGATGCAAGCATGATTCTCGGCTCAGGAGGCTGAACCTCACTGGAAGGAGCGGCTCAAACAGGGCGAAATAGGATTAATAAGGGAA |                                                                                                      |
| twist1b                         | NM_001017820.1 | AATCTTGGGAAAACGGCAATGTTCCAACAGAGGCTCATGGCTTACCAGAGAAAGGCCAGGGCAGGAAATGTCATATGATTCTCTCGCGAGTCTT    |                                                                                                      |
| twist2                          | NM_001005956.1 | ACGCGTCTGATAATGCCGAACGACTGTTACTTCACTAAATTTGAGGATGCCAAAGGATTATCGATGAACCTTAAACCTCAGTACGTTGCCAAA     |                                                                                                      |
| snai1a                          | NM_131066.1    | CCCTGACCCACATCTCTGAAAACAGGTGGCGTCTGCTGATTTCTAGAAAACACACTTGGAGAGAGTCTTATGGAGCAGTGTGACTGCTTACTTT    |                                                                                                      |
| snai1b                          | NM_130989.3    | AGACCACTCCGAGGTGAAGAAGTACCAGTGGGGTGTGCTCTCGGACCTCAGCCGATGCTCTCTGCAACAAGCAGACACTGCGGCTGTGCTCC      |                                                                                                      |
| cdh5                            | NM_001003983.1 | GGATTATGATTTTATACATGAGTGGGACCTCGGTTACGACCTGGCTCAGCTTTATGGAGTAGACGGCTGATTCGATGATGCTCCTCAAGTCCA     |                                                                                                      |
| <b>Cell cycle and apoptosis</b> | cdkn1a         | ENSDART00000113620.2                                                                              | CACAGATAAATCTTGACCTGACTACTCTCTCTCTGGAATAAATACGACAATAACGAGGATGTTAACGGGAATCACGACTGTAGGTAACGGAGCAAA     |
|                                 | cdkn1b         | NM_212792.2                                                                                       | GGGGAAAGGGCTCCGATATTACATCTCTCTCTGGAATAAATACGACAATAACGAGGATGTTAACGGGAATCACGACTGTAGGTAACGGAGCAAA       |
|                                 | cdkn1c         | NM_001002040.1                                                                                    | GAGCGAGACCAGAGCCGGTGAATTTAACTTGTAGACCACTCGCTTTGCTGGAGATTACGAGTGGGAGGCGATTTCAGAGGACACTTTGCCGTTTT      |
|                                 | cyclinD1       | NM_131025.3                                                                                       | ACACGGTGCAGAAATCATGTATAAGTGGCTGCTGTTGTTCTGAAACAGGAGACCTGGCAGTCCCAACAAAGTGGTGTCTTAAATAATGTGACG        |
|                                 | tp53           | NM_131327.1                                                                                       | TGAGGGGACGGGAGCGTTATGAAATTTAAAGAAATGAACGACAGTCTGGAGTTAAGTATGTTGGTGCCTCAGATGCTGAAAAGTATCGTCAGAA       |
|                                 | perp           | NM_001256207.1                                                                                    | ATGGAAGTCAAGTGGTGCATTGTAGGTGAGATTTCAGGCTGGAAGTGTCCCTCAACAGGATATACATGATCACTGATCACTTATTCATGATAGTGG     |
|                                 | baxa           | NM_131562.2                                                                                       | GTCTCAACTGCAAGGGCTTCAAATGTCTGTGAGTGTATTTACAGGTACAAGATGACCTTAAAGTTATGAGGTGGCTGGCAGCAGTGTAGCGCAG       |
|                                 | bcl2           | NM_001030253.2                                                                                    | TGGAGGTTGGGATGCCTCTGGAGATGACGGTACGAGAGAGACTGTGTTCCACCCGTTTTCACTAACAAAAGTGTCCGCTTGGCGGCGCTG           |
|                                 | bcl2l1         | NM_131807.1                                                                                       | GCTTTCAGAGATCTTTGAAAAGATGCAGCGGGGAAAAGCAGGAAATCGCAAGAAAGCTTCAAGAAATGGTGTGTTGTCAGGAATGACCTTGTCCAGGG   |
| pcna                            | NM_131404.1    | TGTGACCTCTAAAGCCATTACATATCTTGGCAGAAATGGCGGGCAGCTTAAATGATGGTATGTTGGGCTTAGCTTTACCAGGCGCTCGTGGGG     |                                                                                                      |
| bmp4                            | NM_131342.2    | GATTGTTTTTAACTCAGCAGCATCCAGAGGACGAACCTCATATCCACCAGAGCTTCGCTCTACAGGCAACAATAGATGACGCTTCTCAGACCC     |                                                                                                      |

|                                             |                      |                                                                                                  |                                                                                                         |
|---------------------------------------------|----------------------|--------------------------------------------------------------------------------------------------|---------------------------------------------------------------------------------------------------------|
| <b>BMP, Shh and angiopoietin signalling</b> | bmp2b                | NM_131360.1                                                                                      | AAGTTTTATCATCAGAAAGAGGCTTTCAGGAGCACTGTCCAGCCTGAAAGAAAAACAACGACAGCAGTCTTTCTTCAACCTTACCTCCATTCTGGCGAGGAG  |
|                                             | bmpr2a               | NM_001039817.1                                                                                   | CAGTTCTGCTCTCTGAAACGTCAGCCTCCACGCGCCGTTTATCTCTCATGAAGATGTTTCTGAGGTTTCGGGGTCAACAGGATCCAGTAGGCATG         |
|                                             | bmpr2b               | NM_001039807.1                                                                                   | CACATGAGCTTGAACCTCGTTCGATAGAAAGAAAGAGGGGAAACAGAAAACTAGTACTGGAACCTTTTTTGGAGCTGAATCCATCCAGAAGCGGCAG       |
|                                             | shha                 | NM_131063.1                                                                                      | CCACGACGCGAGCTGTGTTTACGTCATAGAAACGCAAGAACCCGTTGAAAGATCACCTCCACGCGCTCACTCTTTTTGTCTCGACAACCTCAAC          |
|                                             | shhb                 | NM_131199.2                                                                                      | GAAACATACAAGAGATTATAGATATGAGAAAGCGCAGGGCTGTGCAAGTGTGCAAGCCTTATTTTATCGGATAACCAAAAGGATGGCGCTCAAAAAG       |
|                                             | ptch2                | NM_130988.1                                                                                      | GCCACGCGCTTTTCTTAAACAGATTTCTAAGGGGAAAGCTGTGGACAGAAAGCACCCTGTGGATTTCGGCGAGGTTCCAGGCTTTTCTCTTTTC          |
|                                             | gli1                 | NM_178296.2                                                                                      | GAAACATGATGACATCCATATAATCTCCCTATAACCGACACACATCTGAACCTCATGGATCAGGAGACGCTCTTGTCTTCCACTCCGCTCGTCAATG       |
|                                             | gli2a                | NM_130967.1                                                                                      | GTATTTTGTCTCATTAAGCTGTGTGACTGAAGGACAGCATCTCGCCTTCAAGCTGTAGGCTTACGAACTTTCGCTCCCTTTGAGATGTCTTT            |
|                                             | angpt1               | NM_131813.1                                                                                      | GCTGACGAGGAGGAAAAGTTTCGGGATTGTGCTGATCTTATCAAGCAGGCTTCCAGAAAAACGGAGTTTACACCATCAATATTAGCCACAGAGACCA       |
|                                             | angpt2               | NM_131814.1                                                                                      | TGACAGGAAACACCGCTTATTTCTAGATGACACTTCTACATTGACGAGAAAGATAAGAGATAGTCTCCATGCCAGGGTTTCAAGTGTAGTCTGCT         |
|                                             | tie1                 | ENSDART0000003701.2                                                                              | GGGATAAAAAAGTGTGCTGAATTAAGGCTCAAGGAGTTCGCTCAGAGAATGACCATCGAGACTTTTGTGGAGAAATGGAAGTGTGCTGCAAAATGG        |
|                                             | tie2                 | NM_131461.1                                                                                      | GCGCTCGAAACGCTGCTGGGAGAGAACTTGTGCGGAAAGTGCAGACTTCCGAGGTCAGGAGGTGATCTCAAGAGACCTCAAGAAAGCTGAGGCTG         |
| <b>Haematopoietic/vascular genes</b>        | fli1a                | NM_131348.2                                                                                      | ACTTCTGAGACTCACCGCTTTATAACACCGAGGTCCTTCTCACAATCAATTACTCAGGAAAGTACTCGATATCATACAACACCGCATC                |
|                                             | fli1b                | NM_001003870.1                                                                                   | GTAATTTCTCACGCTCAATCCACTACTGGAACCTCCGCAACAGTGTGGTTATCCAGTTCACCGATGCCACGACATCCAGCAGCTCACACTCACTT         |
|                                             | aplra                | NM_001075105.1                                                                                   | TCAGTTCCAGTGAGATAAACTTACCACAGACTCTGTATCAGACAGAAATCCAAACATTTTCAGTGAACCTATATAAAAGTGTCCAGAGATTGG           |
|                                             | nr2f2                | NM_131183.1                                                                                      | GTATTACAGACGCTTACCTAAGGTTGCGCCCAAGCGAATTTTCGCTCAAGTGTGAGCTCAGTAACTGATTTGTGAACGTTGGGAAATGATGGGTCA        |
|                                             | dab2                 | NM_205757.2                                                                                      | GGCCAGATTTCCAGGTGATGGAGTGAATATAAGCCAAACTATTGGTGTGGATGATGTTCAAGATGCAAGAGGGGATAAATGTGTCAGGATTCATG         |
|                                             | scl alpha            | NM_213237.1                                                                                      | TAGCAATCGAGTCAAGCGCAGACCTGACCTTATGAGGTTGAAATCAACGATGTTTCGACCCAAAATTTGCGACGGATTTCACGAACTCGCGAG           |
|                                             | lmo2                 | NM_131111.1                                                                                      | GCCTACACAATGTGTGCTGGATTTCTGACCTTTGATACACTGTCTAAGACAGCAGAAACAGAGTGCATCTCTGAAAGCGTGTTCGCGCAGATGCTT        |
|                                             | lmo4a                | NM_177984.1                                                                                      | ACATCTTCCCTCAATCTCTCTGTAATGTCACCTTCCACCGAGACCTTCTGCCACTTCTGCGCATCCAGCCACTTAAAGAGTTCAAGAACTACG           |
|                                             | lmo4b                | NM_212689.1                                                                                      | TCTCAAGTGTTCACATGTTCTACTCGCCGAAACCGCTTTCCTGTCAGAGTTCCTACTACACAGGAGCTGTTTGTGAACAGCAGACAGCCC              |
|                                             | ldb2a                | NM_131314.1                                                                                      | TGTCACAACTCCGACAGCCCTTCTACTCGTCCCTTTCGGACCTTTTACCAGGACATTCACCGTACATGGTGCAGCCCGAGTACAGAACTACGA           |
|                                             | tbx20                | NM_131506.1                                                                                      | GTTTCACGAACTCGCAGTAAATGATTATCACAAAGTCTGGAAGCAAGATGTTCCGACAATTCGTGTCAATTTCCGGAGTGGACCCAGAGCCAAA          |
|                                             | hhx                  | NM_130934.1                                                                                      | GAGCATCAGTTACCTTATGATAAGCCCTGCTCTTACTGTAATCTGCAACACTGACCCATACTGACACTGACACTGACACTGAAATGGATGTGAT          |
|                                             | gata2a               | NM_131233.1                                                                                      | ATTTACTGAGTCACTTTGGTACTGAAAGAGCGGACGAGAATCACTGTGTGGTAGTCAAAACGCGCCACTCAAACTCTATAAAGGACTCGCTTTGAGC       |
|                                             | gata2b               | NM_001002689.1                                                                                   | CCCTATACCTTCAATCCGATTAACAGTACAGTACGCGGAGCGCAGAGTATCCCGCAGTGTGTTTCACTCCAGAAATCTGCTCGAAACATGACGACAAA      |
|                                             | etv2                 | NM_001037375.1                                                                                   | CTTTGGCAGTTTCTGCTAGAACTCTGCTGATTTCTGCTTCCGACACTTTTATAAGTGGAGTGTGATGGCTGGGAGTTTAAATGTCAAGTCCCGCTG        |
|                                             | gata1                | NM_131234.1                                                                                      | ACAGACTCTGTTTACTGCCACCCGTTGATGATGAACTTCTACTCAAGCTGTGAGACTGACCTGTCATCGTATTATCCACAGCGTCCAGA               |
|                                             | tif1g                | NM_001002871.1                                                                                   | ACTCGAATCGTGAACGTATGTCGTTGACAGTGTGCCACTCAGGACTCAAAACAGATGATGATGGTGGACAATTACTCTGCAAGGACACTTCAGAGGCCA     |
|                                             | alas2                | NM_131682.2                                                                                      | GGGAGTGGGAAAGTCTTATTTGGTAACTGGAGCAAGATACACTGTGGTGCACAATGAGTCCATTTTAAACAGTCAAGATGTAGATCTCCAT             |
|                                             | gfi1b                | NM_001922262.1                                                                                   | AAAGAGCTTGGCCATGCACTGATGATAGCAACACATGAAGCTCACTCACAGGAAAGAGCTTTGAGTCAAAATGTGGGTAACCTTCAAGCGC             |
|                                             | spi1                 | NM_198062.1                                                                                      | TCTTGGGATATAACAGCAGTCACTTATCCAGTGGACTCGAAGATCTGCGGAGAGCCATTTTACAGAGTCAAAAGCGTGCAGTCACTACATGGCG          |
|                                             | mpx                  | NM_212779.1                                                                                      | GAGAGAGGCTGTTGCTTACATCCACATAGCTTTGGATGTGGCTTCCCTCAACATGCAAAAGAGGCGTGACCATGCTATACCAGTTATAATGATCAT        |
|                                             | mpeg1                | NM_212737.1                                                                                      | TAAACCAGTGTCTTCCACCGTTCAACAGCAGGCTGCGGATGTTGCGCAACACAGTACAGGCTGAGGCTGAGGCTGAGGCTGAGGCTGAGGCTGAGGCT      |
|                                             | csf1ra               | NM_131672.1                                                                                      | TGTAAGTGAAGGAGTGAAGAGTCACTATATTTCTCTGAGACGCTGAAGACTGCTGAATGTTTAAAGCAGGAGCAGCTCTGAGATGTTCTTCGCTCTT       |
|                                             | cebp1                | NM_131837.1                                                                                      | AGCGCTCAGACTCCGATGACTCGCCCTGTATACTCAGACCATCAGCTTACTAAGAGTCCGAGGTTGATGATGGGTTATTTACCCTACTCTCTGTC         |
|                                             | lcp1                 | NM_131320.1                                                                                      | ATGAGGAGGATCTAAGAGCGGATTCATTCACCTGTGCTCTTACTACTCATTATACGCTGAAACAGCTCAGAGTACGCGACGCTGAACCTGTGGACA        |
|                                             | cmyb                 | NM_131266.1                                                                                      | TGAAGACTGGAAAGTATCCGACGCTTCTACCGAATCGAACAGATGTTCAATGCCAGCATCTGTTGGCAGAAAGTCTCAACCTGAACCTATTAAGGA        |
|                                             | ikzf1                | NM_130986.1                                                                                      | GAGAGAATCGTGTGAGAGTATCTTCCAGAGTGGCTCAGTGTGAGCTGATGACGCCCCATGTTGATGATCAGGCCATCAACAGTCAATAGCTATCT         |
|                                             | runx1                | NM_131603.2                                                                                      | AAAAGCAGACACTTATGCTCAAAATGCTGCTCAATGACTAATGACTAATCACTGATGAATATCCACAAGATAAAGGTAACACTCGCTGAAGTGTAGCTTGAC  |
|                                             | cbfbeta              | NM_199209.1                                                                                      | TCCCGGATCAGAGGAGCAAGTTCGAGAAGGAGGTTCTTCCAGGAACTCAGCCGAGTGCAGAGTAAATACACCGGTTTCCGCGATCGGCCGACGA          |
|                                             | itga2b               | NM_001003857.1                                                                                   | TGCTGTGCTTCCCTGGAGATGCGTGGAGTCTTCTCTGTTGACTGTGCTGCTTATTTCAATGGGAGTCAAGGATATCCGAGGACTGGAT                |
|                                             | dnmt4                | NM_001025450.1                                                                                   | TGTAGACTCTGATGCTTAAATGTGTGGTCTTTTGAAGGAAACAGATACAGCTGCGCATCGGGGTTGCGGAAAGAACTTCTGCTTTGTTGCTGT           |
|                                             | gfi1.1               | NM_001020776.1                                                                                   | ACAGGCTAGATTGGAGAGCTGTGAGTATGTTGACCTGAAGCTGATAACGAGAGTAAACATGCCAGGCTATTTTGGTGAAGAGCAACCGGGCGCA          |
| gfi1                                        | NM_201338.1          | AGCGCTACTCAACCTATTACAATGAGCGCGTACCAGCCCTTATTTTCCAGCAAGGAGGATCTGGCCGAAAGTAAACAGACTAGGCTAGGCTCCAC  |                                                                                                         |
| hbbe1.1                                     | NM_131759.1          | GCTGATTGCTGACCATGTTGTTGCTGCTCAGATGGGTGCTGATTACACCTGAAGTTCCAGGCGCTTCCAGAAATTCATCGCTGTTGCGGTGCTCG  |                                                                                                         |
| urod                                        | NM_131347.1          | TGGGTACGGCTTTACCCTGATATGACCCAGAAAATGTGGGCGATTCTGAGGCTGTACATAACCCTCTCGCAGCTTCAACAGCTAATAAAA       |                                                                                                         |
| ptprc                                       | ENSDART00000105607.2 | ATGCTTACTTTAGATGGTACTGTTGTGAGAGAGTGTGATCGCAGCAAGGGCTTTTCAACACCAACAGCAGAGATTTCTGCTACTGCTGATACCA   |                                                                                                         |
| klf2                                        | NM_131856.2          | CTGGACCTAAACCTCAAGCGGAACTGGAATCAGACAGTATAATGTGCTTTAAGTTAACATGATGTGCTGCGGACATCAGCAGAGTCTTTAATATGC |                                                                                                         |
| klf4                                        | NM_131723.1          | TTTTAATATGTTAGCGAACCCTGCGGCAATCACCAGGCTGAGGCTGATGCTGACTCCACCATCTTCACTCTCTGGGATTTTAAAGGCCA        |                                                                                                         |
| <b>Wnt signalling</b>                       | rspo1                | NM_001002352.1                                                                                   | TTCACTTCTGAGCGAAATGATATCCGTCAGATAGGCAATTCGCTGCGCGGTGCTGCTGTGGATATTTAGCAATTCGAAATCGGGATATGAACAAAT        |
|                                             | wnt2bb               | NM_001044344.1                                                                                   | CCCTTGGTGCAGTGTGATCTGTGACAATTTCTGGGCTGGTGAATAAACAGAGACAGTGTGTGAGAAATCTGACATCATGCAATCGATAGGTGG           |
|                                             | wnt16                | NM_001100046.1                                                                                   | CCAAAACAATGTTGACAGACTCGCGTGTGATGGCTATCGGGTTCATGTGCGGTAAGACGTTGGCCGCAATGCTGCTGATTTGAGCGTGTGGGGCGC        |
|                                             | fzd2                 | NM_131140.1                                                                                      | GAAAGACACTGCACTTGGCAGAAAGTCTATGTGCGTTTGCACAGTGTGGAAGGAGGAAACCACTGTTGAAACGAGACATTTGATCCCAATTTT           |
|                                             | fzd7b                | NM_170763.1                                                                                      | ACAACGGTGTGAACCTGAACTTTGAGGACTGCATGTGAGAAATACAGGTCATATAGAAAGGAAAGCTGAACTGCGATCAGGTCACACATTTGCTGATGG     |
|                                             | taz                  | NM_001001814.1                                                                                   | TCTGGGAGTCTTAAAGTTCCGGCAGTTGTGGCACTTAAACAGATGAGATGGACACTGCTGCTGCTGACTCCACCATCTTCACTCTCTGGGATTTTAAAGGCCA |
| <b>Housekeeping genes</b>                   | actb1                | NM_131031.1                                                                                      | GATCTTGCAGGACTTCCTAGGGTATGTGAATAAGGATGTCCTTGAATAAGTGAAGCAGGGTGTCTCTGACTGACAAGTCAACCCAAATAAAAAG          |
|                                             | actb2                | NM_181601.3                                                                                      | CCTGGCATATTGTAAGAGCTGTGGAACGTTGGCGTGCCAGACATTTGGTGGGCAACCTGTACTGACTAATTAATCAATAAAGTGCACAT               |
|                                             | gapdhs               | NM_213094.2                                                                                      | GAGGTTTAGCACCAATCCACTCTTCAATAATGTCTGAGCTTTGTTGGAATCAATGATTTGGCGTATTGGCGTTTGGCTCAGGCGCTGC                |
|                                             | ubic                 | NM_001077804.1                                                                                   | AGATGGACGCACTGTGCGGACACAACATCCAGAAGAGTCCACCTCCACTGGTGTCTGCTGCTGCTGCTGCGGCAAAATATCTGCTTATGATTAATCA       |
|                                             | sdha                 | NM_200910.1                                                                                      | AAGACTATGACAGTACGACGCTGTTCCGACTGAGAGTCTGTAAGAGGAGGTTGTGCAAGATGGATCCGCTATAAGTCGATGGATAAACATTA            |
|                                             | eef1a1a              | NM_200009.1                                                                                      | TCTCGTCACTGACAGCTTATGTTAGCACTTTGACTGGGCTAAGGCTAACCCTGCAACAGCACTTGTGACTTTAATGGCATTTGACTGACTGACTG         |
| <b>pronephric duct</b>                      | chordin              | NM_130973.1                                                                                      | CGACTCTGGGAGGAAAGGAGTGTGAGTCTGTTGATTCTTCCAGAAAAAGATGACGATTTGCAAACTCAACAGCAGATCGTACATCAGCTCC             |
|                                             | cdh17                | NM_194422.1                                                                                      | GCATTTTGTACTACTTGAACCTTCTGTCAGATTGGTCACTGGGATTGATCTAGAGGCAAAAAGGGCCATTAATAGATACGGTTTTAGATGTGCCAG        |
|                                             | pax2a                | NM_131184.2                                                                                      | CCATTTGAGAGAGGGGACTGAGAGACACTGCGCTGCTCATGTTTTTCTGCTGACTTCCGACAGAACTGACTGACCCCTCAGACTGTTCCAGAC           |

## Supplemental References

- Bahary, N., Goishi, K., Stuckenholtz, C., Weber, G., Leblanc, J., Schafer, C.A., Berman, S.S., Klagsbrun, M., and Zon, L.I. (2007). Duplicate VegfA genes and orthologues of the KDR receptor tyrosine kinase family mediate vascular development in the zebrafish. *Blood* *110*, 3627-3636.
- Bertrand, J.Y., Kim, A.D., Teng, S., and Traver, D. (2008). CD41+ cmyb+ precursors colonize the zebrafish pronephros by a novel migration route to initiate adult hematopoiesis. *Development* *135*, 1853-1862.
- Cheah, F.S., Winkler, C., Jabs, E.W., and Chong, S.S. (2010). Tgfbeta3 regulation of chondrogenesis and osteogenesis in zebrafish is mediated through formation and survival of a subpopulation of the cranial neural crest. *Mech Dev* *127*, 329-344.
- Chocron, S., Verhoeven, M.C., Rentzsch, F., Hammerschmidt, M., and Bakkers, J. (2007). Zebrafish Bmp4 regulates left-right asymmetry at two distinct developmental time points. *Dev Biol* *305*, 577-588.
- Clements, W.K., Kim, A.D., Ong, K.G., Moore, J.C., Lawson, N.D., and Traver, D. (2011). A somitic Wnt16/Notch pathway specifies haematopoietic stem cells. *Nature* *474*, 220-224.
- Danilova, N., Sakamoto, K.M., and Lin, S. (2011). Ribosomal protein L11 mutation in zebrafish leads to haematopoietic and metabolic defects. *Br J Haematol* *152*, 217-228.
- Espin-Palazon, R., Stachura, D.L., Campbell, C.A., Garcia-Moreno, D., Del Cid, N., Kim, A.D., Candel, S., Meseguer, J., Mulero, V., and Traver, D. (2014). Proinflammatory signaling regulates hematopoietic stem cell emergence. *Cell* *159*, 1070-1085.
- Geiss, G.K., Bumgarner, R.E., Birditt, B., Dahl, T., Dowidar, N., Dunaway, D.L., Fell, H.P., Ferree, S., George, R.D., Grogan, T., *et al.* (2008). Direct multiplexed measurement of gene expression with color-coded probe pairs. *Nat Biotechnol* *26*, 317-325.
- Gering, M., and Patient, R. (2005). Hedgehog signaling is required for adult blood stem cell formation in zebrafish embryos. *Dev Cell* *8*, 389-400.
- Jin, S.W., Beis, D., Mitchell, T., Chen, J.N., and Stainier, D.Y. (2005). Cellular and molecular analyses of vascular tube and lumen formation in zebrafish. *Development* *132*, 5199-5209.
- Kolde, R. (2013). pheatmap: Pretty Heatmaps. R package version 0.7.7. (<http://cran.r-project.org/web/packages/pheatmap/index.html>).
- Link, V., Shevchenko, A., and Heisenberg, C.P. (2006). Proteomics of early zebrafish embryos. *BMC Dev Biol* *6*, 1.
- Livak, K.J., and Schmittgen, T.D. (2001). Analysis of relative gene expression data using real-time quantitative PCR and the 2<sup>-Delta Delta C(T)</sup> Method. *Methods* *25*, 402-408.
- Monteiro, R., Pouget, C., and Patient, R. (2011). The gata1/pu.1 lineage fate paradigm varies between blood populations and is modulated by tif1gamma. *EMBO J* *30*, 1093-1103.
- Simoës, F.C., Peterkin, T., and Patient, R. (2011). Fgf differentially controls cross-antagonism between cardiac and haemangioblast regulators. *Development* *138*, 3235-3245.
- Waggott, D., Chu, K., Yin, S., Wouters, B.G., Liu, F.F., and Boutros, P.C. (2012). NanoStringNorm: an extensible R package for the pre-processing of NanoString mRNA and miRNA data. *Bioinformatics* *28*, 1546-1548.
- Yamamoto, M., Morita, R., Mizoguchi, T., Matsuo, H., Isoda, M., Ishitani, T., Chitnis, A.B., Matsumoto, K., Crump, J.G., Hozumi, K., *et al.* (2010). Mib-Jag1-Notch signalling regulates patterning and structural roles of the notochord by controlling cell-fate decisions. *Development* *137*, 2527-2537.
